# Supplementary figures and images for: Synthesis and structure of La14V6CuO36.5: a transparent Cu(i) vanadate containing [OCuO]3−sticks
Source: Royal Society of Chemistry journal article supplement (doi:10.1039/b203257k), 2002-01-01

I  
n  
t  
e  
n  
s  
i  
t  
y

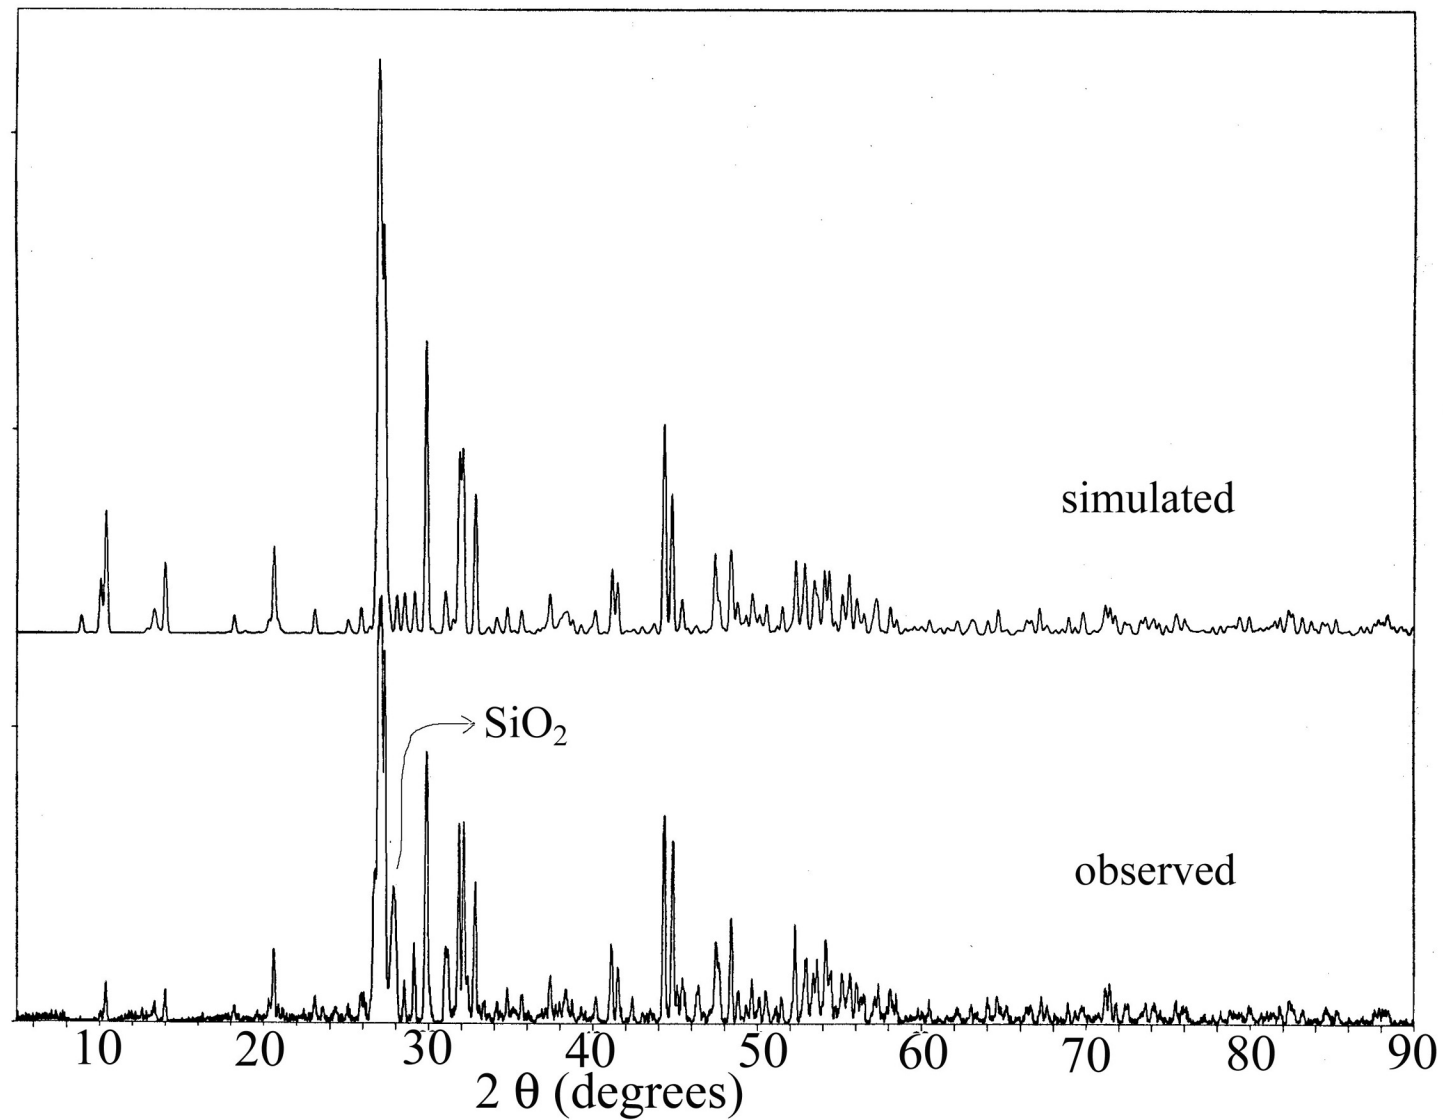

simulated

observed

$\text{SiO}_2$

10

20

$2\theta$  (degrees)

40

50

60

70

80

90

Supplement: b203257k.pdf [file b203257k.pdf]
